# Supplementary material
Source: MDPI journal article supplement (https://www.mdpi.com/2072-4292/13/11/2093)
Supplement: s1 [file s1]

# Estimation of rangeland production in the arid Oriental region (Morocco) combining remote sensing vegetation and rainfall indices: challenges and lessons learned

Marie Lang <sup>1\*</sup>, Hamid Mahyou <sup>2</sup> and Bernard Tychon <sup>1</sup>

1 University of Liege, Department of Environmental Sciences and Management, 185 Avenue de Longwy, 6700 Arlon, Belgium

2 Centre Régional de la Recherche Agronomique d'Oujda, Institut National de la Recherche Agronomique Maroc, Oujda, Morocco

\* Correspondence: marie.lang@uliege.be

## Supplementary material

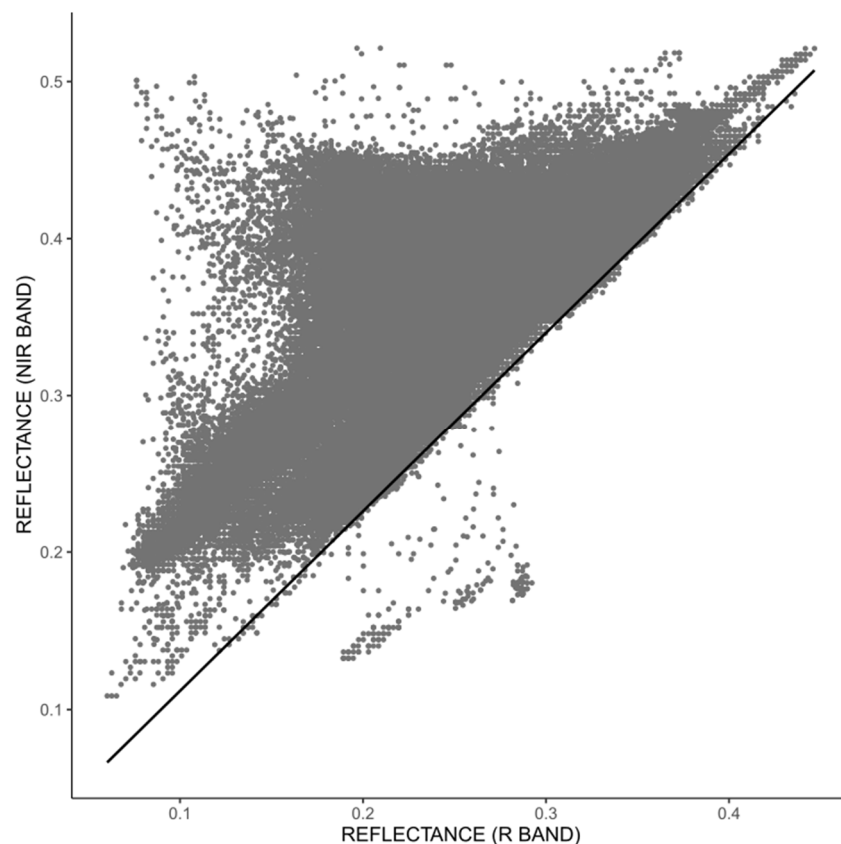

**Figure S1.** Soil line in the NIR vs R space (line = quantile regression with  $\tau = 2 \times 10^{-3}$ ).

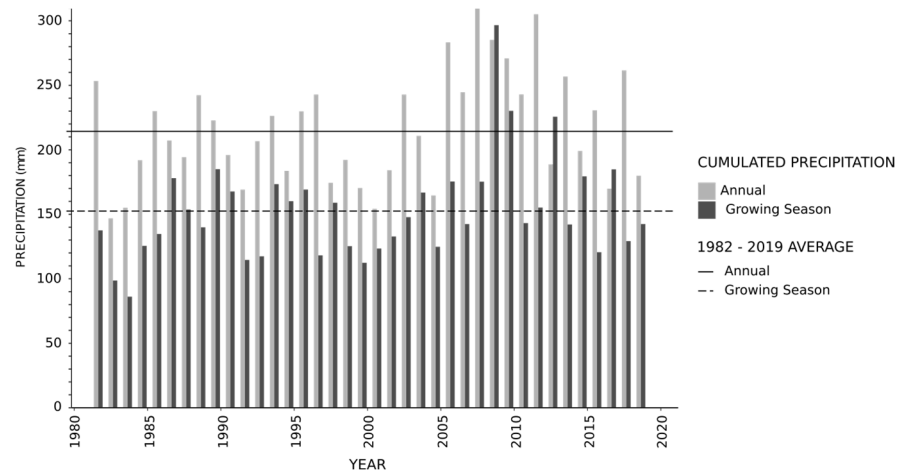

**Figure S2.** Evolution of precipitation (mm) from 1982 to 2019 over the Oriental. Bars = cumulated precipitation over the year and the growing season (growing season  $i$  = September of year  $i-1$  to March of year  $i$ ). Lines = 1982 – 2019 average for annual and growing season precipitation. Data: CHIRPS v2.0 ([81]).

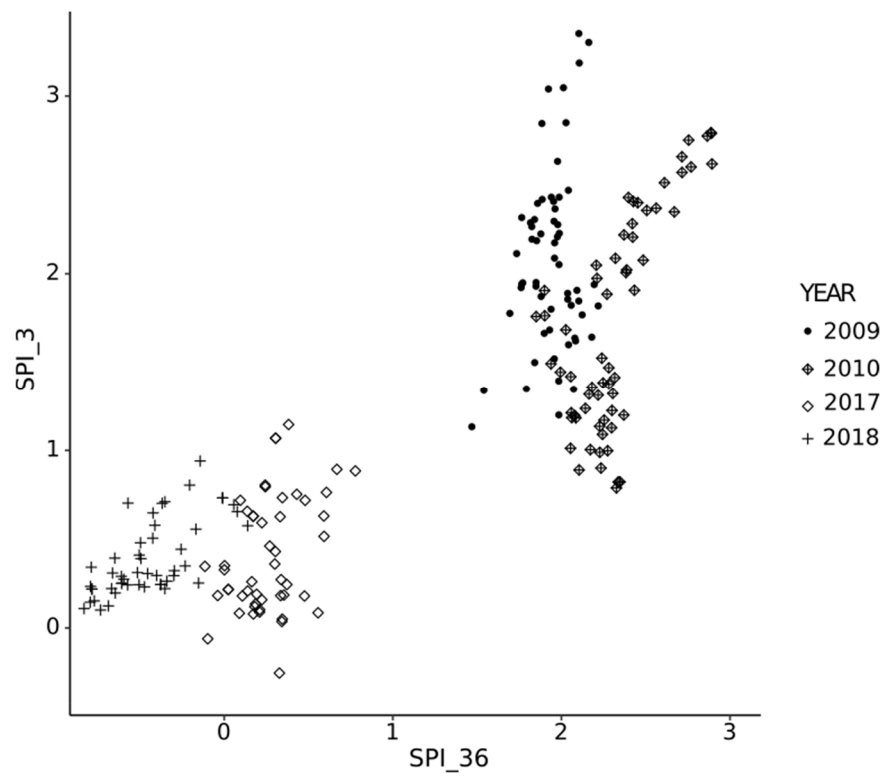

**Figure S3.** Short-term (SPI<sub>3</sub>) and long-term (SPI<sub>36</sub>) precipitation conditions over the study sites in 2009, 2010, 2017, and 2018.

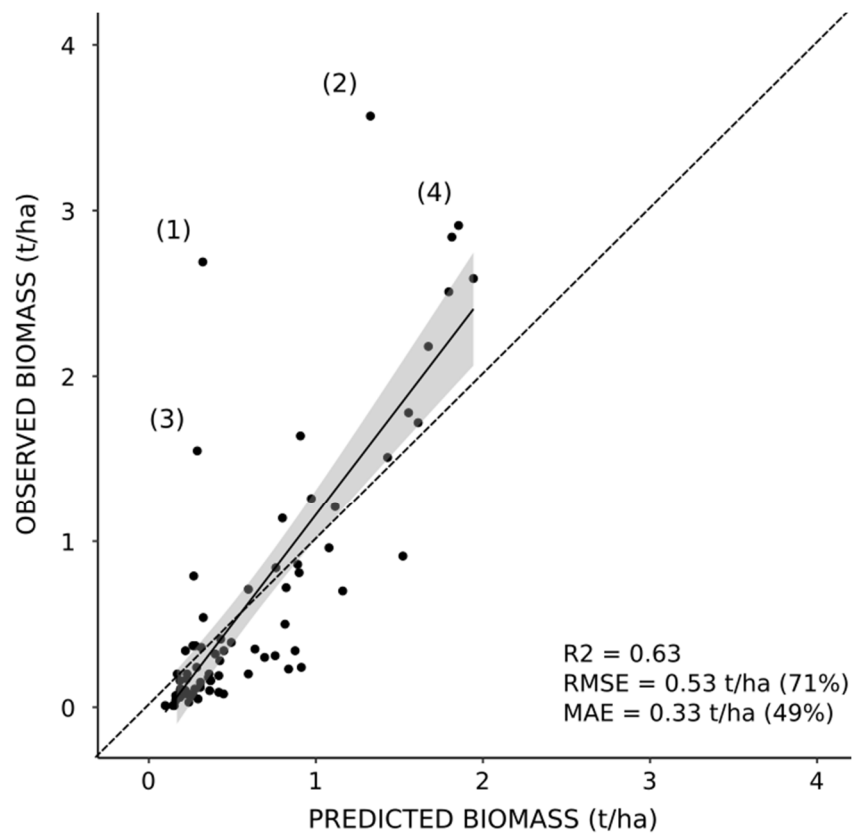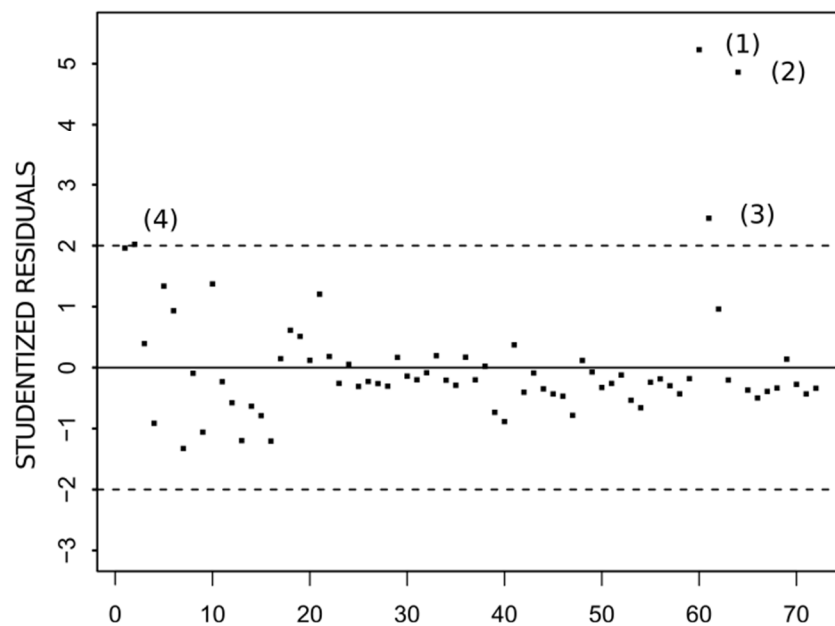

**Figure S4.** Relationship between observed and predicted biomass values (top), and studentized residuals (bottom) for the validation sample. 1 to 4: observations characterized by a value of studentized residuals outside the  $[-2,2]$  interval (identification of observations in Table 5). Top panel: solid line = linear fit, grey area = 95% confidence interval on regression line, dashed line=  $Y = X$ .

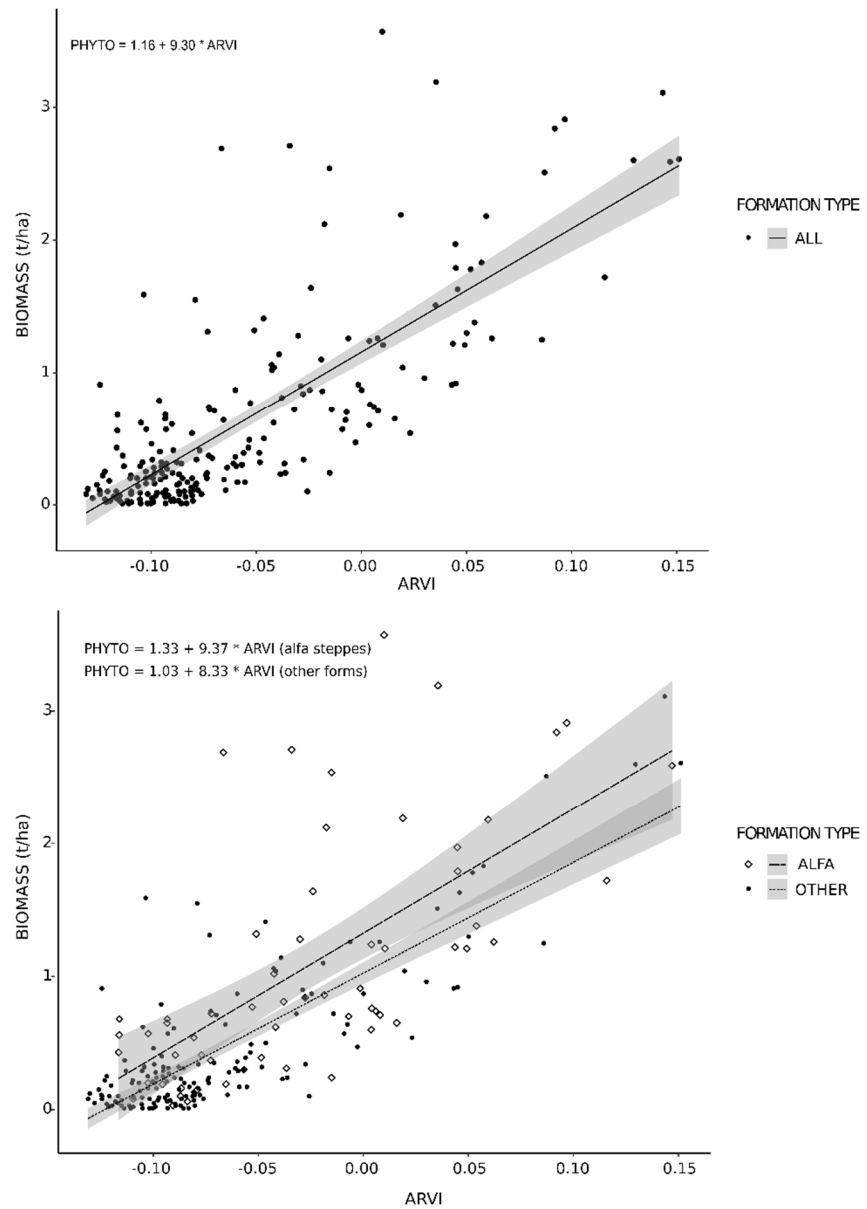

**Figure S5.** Comparison of the linear relation between biomass and ARVI for the overall case (top) and alfa steppes vs other types of vegetation formation (bottom). Solid and dashed lines = linear regression, grey area = 95% confidence interval on the regression line.

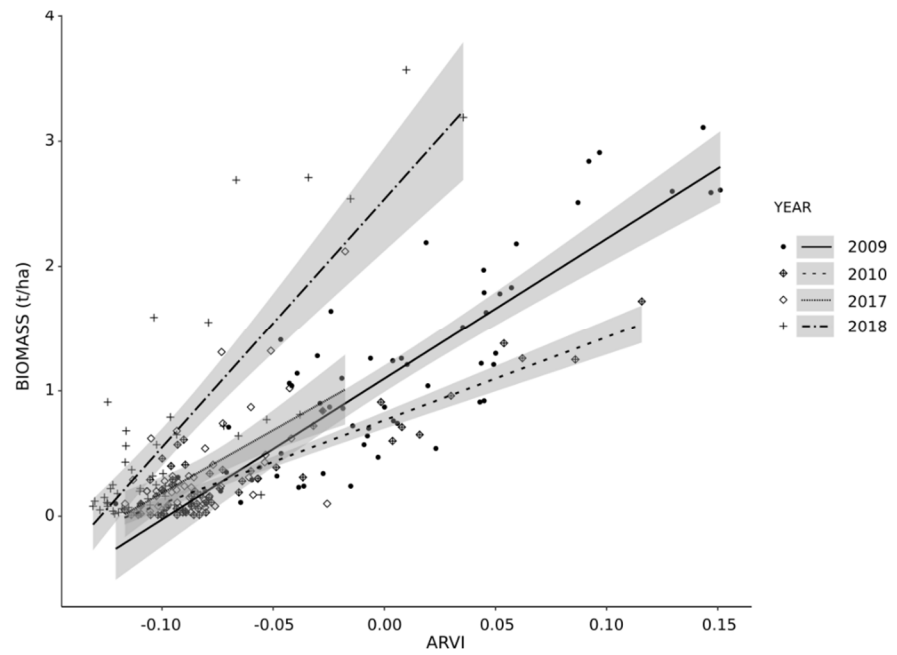

**Figure S6.** Comparison of the linear relation between alfa steppes biomass and ARVI for the years 2009, 2010, 2017, and 2018. Solid and dashed lines = linear regression, grey area = 95% confidence interval on the regression line.
